# Disposition of Remifentanyl in Obesity

## A New Pharmacokinetic Model Incorporating the Influence of Body Mass

Tae Kyun Kim, M.D., Shinju Obara, M.D., Talmage D. Egan, M.D., and the Remifentanyl Pharmacokinetics in Obesity Investigators\*

### ABSTRACT

**Background:** The influence of obesity on the pharmacokinetic (PK) behavior of remifentanyl is incompletely understood. The aim of the current investigation was to develop a new population PK model for remifentanyl that would adequately characterize the influence of body weight (among other covariates, *e.g.*, age) on the disposition of remifentanyl in the general adult population. We hypothesized that age and various indices of body mass would be important covariates in the new model.

**Methods:** Nine previously published data sets containing 4,455 blood concentration measurements from 229 subjects were merged. A new PK model was built using nonlinear mixed-effects modeling. Satisfactory model performance was assessed graphically and numerically; an internal, boot-strapping validation procedure was performed to determine the CIs of the model.

**Results:** Body weight, fat-free body mass, and age (but not body mass index) exhibited significant covariate effects on certain three-compartment model parameters. Visual and numerical assessments of model performance were satisfactory. The boot-strap procedure showed satisfactory CIs on all of the model parameters.

**Conclusions:** A new model estimated from a large, diverse data set provides the PK foundation for remifentanyl dosing calculations in adult obese and elderly patients. It is suitable for use in target-controlled infusion systems and pharmacologic simulation. (*ANESTHESIOLOGY* 2017; 126:1019-32)

REMIFENTANIL is an esterase metabolized  $\mu$  opioid agonist in widespread clinical use internationally, often as part of total intravenous anesthetic techniques. The clinical pharmacology of remifentanyl has been exhaustively investigated, perhaps more so than any previously introduced fentanyl congener. Population mixed-effects models describing the pharmacokinetic (PK) and pharmacodynamic (PD) behaviors of remifentanyl in quantitative terms have been developed and validated.<sup>1-4</sup> The influences of numerous covariate effects, such as age, sex, kidney function, and hepatic function, have also been characterized (some of these covariate effects are incorporated into PK-PD models that are widely applied clinically).<sup>3,5,6</sup> The synergistic interaction of remifentanyl when combined with propofol or inhaled anesthetics has also been modeled and evaluated in the clinical domain.<sup>7-11</sup>

### What We Already Know about This Topic

- The pharmacokinetics and pharmacodynamics of remifentanyl have been described by population mixed-effects models
- The effects of covariates, including age, sex, kidney function, and hepatic function, on remifentanyl pharmacokinetics and pharmacodynamics have been characterized and incorporated into models
- The effect of obesity on remifentanyl pharmacokinetics is not well understood

### What This Article Tells Us That Is New

- A general-purpose remifentanyl pharmacokinetic model was developed using pharmacokinetic data from studies of adults
- Model parameters were influenced by the patient covariates total body weight, fat-free mass, and age but not body mass index or sex
- This new model provides the pharmacokinetic basis for remifentanyl dosing calculations in obese and elderly adult patients

Corresponding articles on pages 993 and 1005. Supplemental Digital Content is available for this article. Direct URL citations appear in the printed text and are available in both the HTML and PDF versions of this article. Links to the digital files are provided in the HTML text of this article on the Journal's Web site ([www.anesthesiology.org](http://www.anesthesiology.org)). This work was last presented in preliminary, abstract form at the 91<sup>st</sup> Annual Scientific Meeting of the Korean Society of Anesthesiologists, Seoul, Korea, November 6 to 8, 2014.

Submitted for publication December 8, 2015. Accepted for publication February 22, 2017. From the Department of Anesthesia and Pain Medicine, Pusan National University School of Medicine, Busan, Korea (T.K.K.); Department of Anesthesiology, Fukushima Medical University School of Medicine, Fukushima, Japan (S.O.); and Department of Anesthesiology, University of Utah School of Medicine, Salt Lake City, Utah (T.D.E.).

\*Members of the Remifentanyl Pharmacokinetics in Obesity Investigators are listed in the appendix.

Copyright © 2017, the American Society of Anesthesiologists, Inc. Wolters Kluwer Health, Inc. All Rights Reserved. *Anesthesiology* 2017; 126:1019-32

Despite this substantial collection of PK–PD models characterizing the disposition, effects, and interactions of remifentanyl, a clear unmet need in our understanding of the clinical pharmacology of remifentanyl relates to the influence of obesity on remifentanyl PKs. Previous investigations addressing this issue suffer from some important limitations despite using rigorous data-gathering methods and advanced model-building techniques. The study by Minto *et al.*,<sup>3</sup> the most widely used model in target-controlled infusion (TCI) systems, was methodologically flawed as it relates to the obesity covariate, because the equations (*i.e.*, the James' Equations) used to calculate lean body mass in this study are now known to be seriously flawed, particularly in very obese patients.<sup>12</sup> More importantly, the Minto model was estimated from volunteer subjects that did not include obese subjects. The study by Egan *et al.*,<sup>13</sup> although focused entirely on the influence of obesity on remifentanyl PKs, must be regarded as preliminary and incomplete, because the study was relatively small and, although the study compared obese and lean groups, the study population did not include large numbers of morbidly obese patients. Studies by La Colla *et al.*<sup>14,15</sup> also address remifentanyl PKs in the obese patient population, but these studies offer workarounds to address the flawed lean body mass calculations of the study by Minto *et al.*<sup>3</sup> rather than a new PK model that clearly incorporates body weight indices into the parameters of a PK model. The work by La Colla *et al.*<sup>15</sup> clearly demonstrates that the performance of the PK parameters from Minto *et al.*<sup>3</sup> lead to a large bias when applied to morbidly obese patients.

The relevance of the current study is in part a function of the international obesity epidemic. Given the high prevalence of obesity around the world and the high incidence of obesity-associated disease, obese patients frequently present for anesthesia and operations, sometimes to treat their obesity by a bariatric procedure.<sup>16–19</sup> Understanding the influence of obesity on the disposition of anesthetic drugs is therefore an important question in contemporary anesthesia practice.<sup>20</sup> The aging of the worldwide population in many developed countries and the high incidence of age-related comorbidities make understanding the influence of age on anesthetic drug disposition and effects similarly important, although the age issue has already been explored in detail, especially for advanced age.

The aim of the current investigation was to develop a new population PK model for remifentanyl that would adequately characterize the influence of body weight (among other covariates, *e.g.*, age) on the disposition of remifentanyl in the general adult population. We hypothesized that age and various indices of body mass would be important covariates in the new model. Our practical aim was to build an updated PK model for remifentanyl suitable for general adult use, including obese patients.

## Materials and Methods

### Data Set

The data set for model building was derived from nine previously published studies by Egan *et al.*,<sup>1,2,13,21</sup> Minto *et al.*,<sup>3</sup> Drover and Lemmens,<sup>22</sup> Mertens *et al.*,<sup>4</sup> Kern *et al.*,<sup>23</sup> and La Colla *et al.*<sup>15</sup> All of the studies were approved by local human-subject institutional review boards, and all of the subjects gave informed consent (see individual studies for details). In total, there were 4,455 remifentanyl concentration measurements from 229 subjects (107 patients and 122 volunteers); all of the subjects and data points from the nine previously published studies were included in the data set for analysis. The studies included remifentanyl administration by bolus injection, continuous infusion, and TCI. Blood sampling ranged from 2 to 523 min. The measured plasma concentrations ranged from 0.054 to 245.4 ng/ml. Details about each of the nine studies composing the data set are presented in tables 1 and 2.

### Population Modeling

Population PK analyses were performed using NONMEM (version 7.2, Icon Development Solutions, USA). Three-compartment models with linear PKs were fitted using ADVAN6 subroutines and the first-order conditional estimation with interaction procedure.

A log normal variance model was used to describe the interindividual variability of the remifentanyl PK parameters according to the following equation:

$$\theta_i = \theta_{TV} \times \exp(\eta_i) \quad (1)$$

where  $\theta_{TV}$  is a population mean value for the PK parameters of the population,  $\theta_i$  is the individual *post hoc* estimate for the PK parameter in the *i*th subject, and  $\eta_i$  is a random variable that represents the difference between individual ( $\theta_i$ ) and population ( $\theta_{TV}$ ) values that is a normally distributed random variable with a mean of 0 and a variance of  $\omega^2$ .

For the intraindividual variability that describes the residual errors, combined error models were tested using the following equation:

$$C_{ij} = C_{pred,ij} \times (1 + \varepsilon_{pro,ij}) + \varepsilon_{add,ij} \quad (2)$$

where  $C_{ij}$  is the *j*th plasma concentration measured in the *i*th subject;  $C_{pred,ij}$  is the *j*th concentration predicted based on the model parameters, dosing regimen, and sampling time in the *i*th patient; and  $\varepsilon_{pro,ij}$  and  $\varepsilon_{add,ij}$  are the coefficient of proportional residual error and coefficient of additive residual error terms, respectively, which are normally distributed random variables with a mean of 0 and variance of  $\sigma^2$ .

### Covariate Modeling

The potential covariates affecting model structural parameters were explored for body weight, age, sex, body mass

**Table 1.** Demographics of Each Individual Data Set and the Combined Data Set

| Demographic                        | Egan (1993) <sup>1</sup>  | Egan (1996) <sup>2</sup>  | Minto (1997) <sup>3*</sup> | Egan (1998) <sup>13</sup> | Drover (1998) <sup>22</sup> | Mertens (2003) <sup>4</sup> | Kern (2004) <sup>8</sup>     | Egan (2005) <sup>21</sup>  | La Colla (2010) <sup>15</sup> | Combined                   |
|------------------------------------|---------------------------|---------------------------|----------------------------|---------------------------|-----------------------------|-----------------------------|------------------------------|----------------------------|-------------------------------|----------------------------|
| No. of subjects (original article) | 10 (10)                   | 10 (10)                   | 65 (65)                    | 24 (24)                   | 38 (40)                     | 30 (30)                     | 19 (24)                      | 38 (64)                    | 15 (15)                       | 229 (262)                  |
| Age (yr)                           | 28.0 (4)<br>(22–38)       | 28.5 (4.8)<br>(23–39)     | 47.0 (21.2)<br>(20–85)     | 38.2 (7.3)<br>(29–54)     | 54.8 (13.0)<br>(28–78)      | 37.4 (7.9)<br>(25–57)       | 26.1 (4.9)<br>(20–41)        | 31.2 (11.7)<br>(20–70)     | 42.3 (12.2)<br>(20–64)        | 41.4 (16.7)<br>(20–85)     |
| Weight (kg)                        | 79.2 (12.2)<br>(63–98)    | 83.5 (11.8)<br>(70.5–100) | 74.1 (14.7)<br>(45–106)    | 88.5 (28.6)<br>(49–139.5) | 70.9 (15.1)<br>(45.5–105.4) | 66.9 (11.1)<br>(52–92)      | 73.2 (11.7)<br>(55.5–91.8)   | 72.6 (12.7)<br>(49.1–97.7) | 188.2 (15.7)<br>(145–215)     | 81.3 (32.9)<br>(45–215)    |
| Height (cm)                        | 176.5 (8.3)<br>(160–185)  | 183.7 (6.1)<br>(175–193)  | 172.5 (10.0)<br>(156–193)  | 170.3 (9.3)<br>(150–185)  | 169.4 (10.7)<br>(152.4–193) | 166.4 (8.6)<br>(153–193)    | 176.0 (9.9)<br>(162.6–195.6) | 173.4 (8.1)<br>(155–188)   | 164.7 (4.4)<br>(158–173)      | 170.9 (9.7)<br>(150–195.6) |
| BMI (kg/m <sup>2</sup> )           | 25.5 (3.9)<br>(18.4–31.1) | 24.7 (2.3)<br>(21.2–28.3) | 24.8 (3.6)<br>(16.1–32.7)  | 30.3 (8.9)<br>(19.0–42.8) | 24.4 (2.8)<br>(19.0–30.1)   | 24.0 (2.7)<br>(19.8–31.6)   | 23.5 (2.7)<br>(20.3–30.0)    | 24.1 (3.5)<br>(17.0–32.2)  | 69.4 (5.0)<br>(52.0–73.7)     | 27.9 (11.9)<br>(16.1–73.7) |
| Sex (M/F)                          | 10/0                      | 10/0                      | 38/27                      | 8/16                      | 18/20                       | 0/30                        | 12/7                         | 21/17                      | 0/15                          | 97/132                     |

Data are mean (SD) (range or frequency).

\*The Minto data set of 1997 includes two data sets from Egan originally published in 1993 and 1996.

F = female; M = male.

**Table 2.** Dosing and Pharmacokinetic Sampling Characteristics of the Individual Studies and Combined Data Set

| Characteristic                     | Minto (1997) <sup>3*</sup>                                 | Egan (1998) <sup>13</sup> | Drover (1998) <sup>22</sup> | Mertens (2003) <sup>4</sup> | Kern (2004) <sup>8</sup> | Egan (2005) <sup>21</sup> | La Colla (2010) <sup>15</sup> | Combined            |
|------------------------------------|------------------------------------------------------------|---------------------------|-----------------------------|-----------------------------|--------------------------|---------------------------|-------------------------------|---------------------|
| No. of subjects (original article) | 65 (65)                                                    | 24 (24)                   | 38 (40)                     | 30 (30)                     | 19 (24)                  | 38 (64)                   | 15 (15)                       | 229 (262)           |
| Dosing scheme                      | 1–8 µg · kg <sup>-1</sup> · min <sup>-1</sup> for 4–20 min | 7.5–10.0 µg/kg for 1 min  | TCl various dose            | TCl various dose            | TCl up to 80 ng/ml       | 50–200 µg bolus           | 5–50 µg/min infusion          |                     |
| Sampling site                      | Arterial                                                   | Arterial                  | Arterial                    | Arterial                    | Arterial                 | Arterial                  | Arterial                      |                     |
| No. of samples                     | 1992                                                       | 344                       | 893                         | 436                         | 278                      | 286                       | 226                           | 4455                |
| Sampling period (min)              | 81 (32)<br>(44–230)                                        | 43 (10)<br>(30–60)        | 194 (82)<br>(79–523)        | 161 (51)<br>(77–294)        | 212 (93)<br>(93–364)     | 19 (7)<br>(2–30)          | 114 (22)<br>(70–150)          | 109 (83)<br>(2–523) |
| Additional drugs                   | G,S,P,M                                                    | G,V,Mi,T,N,I,F            | P,S,Ne,A,N,I,Mo,E           | P                           | P                        |                           | F,P,S,C                       |                     |
| Volunteer/patient                  | Volunteers                                                 | Patients                  | Patients                    | Patients                    | Volunteers               | Volunteers                | Patients                      |                     |

Data are mean (SD) (range or frequency).

\*The Minto data set of 1997 includes two data sets from Egan originally published in 1993 and 1996.

A = atropine; C = cisatracurium; E = epidural lidocaine 2%; F = fentanyl; G = glycopyrrolate; I = isoflurane; M = metoclopramide; Mi = midazolam; Mo = morphine; N = nitrous oxide; Ne = neostigmine; P = pancuronium; S = succinylcholine; T = thiopental; TCl = target-controlled infusion; V = vecuronium.

index (BMI), and fat-free mass (FFM) with the formula by Janmahasatian *et al.*<sup>24</sup> FFM was calculated from sex, weight (in kilograms), and BMI (in kilograms per meter squared):

$$FFM_{male} = \frac{9.27 \times 10^3 \times TBW}{6.68 \times 10^3 + 216 \times BMI} \quad (3)$$

$$FFM_{female} = \frac{9.27 \times 10^3 \times TBW}{8.78 \times 10^3 + 244 \times BMI} \quad (4)$$

To explore the covariate-parameter relationships that could further explain interindividual variability, the estimated parameters obtained from a three-compartment model without any covariates were plotted independently against body weight, age, sex, BMI, and FFM. Those graphical relationships were examined visually to identify potentially important covariate effects. Promising covariates were then entered into the base model sequentially (with either a linear or power function centered on the median of the covariate depending on the exploratory plots).

The process for including covariate effects within the mixed-effects structural model proceeded as advocated by Jonsson and Karlsson.<sup>25</sup> Starting from the base model, potentially important covariate-parameter relationships were individually tested in a stepwise fashion building the model forward (*i.e.*, the forward inclusion process). The most influential covariates in terms of the NONMEM objective function value (OFV) reduction were iteratively retained in the model. The minimal OFV reduction (equal to minus twice the log likelihood) statistically justifying inclusion of a candidate covariate effect into the model was determined by a *P* value of less than 0.01, that is, a decrease in the OFV of at least 6.63 points for one additional parameter (using a chi-square distribution, 1 degree of freedom).

When no more covariate effects were statistically justified for inclusion into the model, the so-called final model was defined. Thereafter, a backward elimination procedure was performed in which each covariate was removed in turn from the final model, and the difference in OFV between the final and each reduced model was examined. An increase in OFV of 10.83 (*P* < 0.001) was required to retain the covariate in the final model (*i.e.*, the threshold for the change in OFV during the backward elimination procedure was set more parsimoniously than during the forward inclusion of covariates).

### Model Evaluation

Goodness of fit for all models was visually inspected with plots of observed *versus* predicted values, looking for visual evidence of inaccuracy and bias. The conditional weighted residuals (CWRES) of the PK models were plotted as a function of time to assess model misspecification.<sup>26</sup> Predictive performance and log likelihood profiles were examined, facilitated by Wings for NONMEM, xpose4 (version 4.0), and fit4NM run on the R statistical software package

(version 2.13.1, the R Foundation for Statistical Computing, Austria).<sup>27</sup> As an internal validation procedure, a non-parametric, bootstrap analysis was conducted.

The predictive performance of the models was evaluated numerically by computing the performance error (PE).<sup>28</sup> For each blood sample the PE was calculated as follows:

$$PE_{ij}(\%) = \left[ \frac{C_{m,ij} - C_{p,ij}}{C_{p,ij}} \right] \times 100 \quad (5)$$

where  $C_{p,ij}$  is the predicted blood remifentanyl concentration in *j* th sample from the *i* th patient, and  $C_{m,ij}$  is the measured blood concentration of remifentanyl in that sample. Subsequently, the median prediction error (MDPE) and median absolute prediction error (MDAPE), which indicate bias and inaccuracy, respectively, were calculated in a pooled data method as follows:

$$MDPE = \frac{1}{\sum_{i=1}^M N_i} \times \sum_{i=1}^M (N_i \times MDPE_i) \quad (6)$$

$$MDPE_i(\%) = \text{median} \{ PE_{ij}, j = 1, \dots, N_i \} \quad (7)$$

$$MDAPE = \frac{1}{\sum_{i=1}^M N_i} \times \sum_{i=1}^M (N_i \times MDAPE_i) \quad (8)$$

$$MDAPE_i(\%) = \text{median} \{ |PE_{ij}|, j = 1, \dots, N_i \} \quad (9)$$

where  $MDPE_i$  and  $MDAPE_i$  are median PE and median absolute PE of *i* th individual,  $PE_{ij}$  is the PE in *j* th sample from *i* th individual,  $N_i$  is the number of observation in *i* th individual, and *M* is the number of individuals.

The robustness of the MDPE and MDAPE calculations were evaluated with a 2-fold cross-validation procedure. With this method, the data set was randomly divided into two parts: the first arm was used to estimate parameters and the second arm was used to predict concentrations with the parameters derived from the first arm. This process was repeated after exchanging the arms. The prediction results of the two arms are then combined and treated as one data set. This process was repeated 10 times with different random partitioning of the data set. All of the results were pooled, and MDPE and MDAPE were calculated.

To evaluate the robustness of the final model, a non-parametric bootstrap analysis was performed as an internal validation procedure.<sup>29</sup> Two-thousand bootstrap data set replicates were generated randomly by resampling with replacement (*i.e.*, each data set included 229 subjects selected randomly; in each data set, some subjects might be randomly represented more than once and some might be randomly omitted). Model parameters for each of these data sets were estimated using NONMEM. Median parameter values and the 2.5 to 97.5 percentiles from the bootstrap



procedure were compared with those of the final model parameter estimates. If the final model parameter estimates were not significantly different from the results of the bootstrap procedure, the model was considered stable.

Log-likelihood profiles (LLPs) for each of the final model parameters were computed as a means of evaluating uncertainty in the parameters. LLPs are computed by fixing a given model parameter at values around the final model estimate and then rerunning the model to obtain new OFVs. Plots of the fixed parameter values *versus* the OFVs (*i.e.*, the LLPs) are intended to reveal whether there is a problem with parameter identification. The LLP determines the parameter values on either side of the final estimate that produce a deterioration in the OFVs of 3.84. This relies on the assumption that the difference of  $-2LL$  follows a chi-square distribution and that when this value changes by 3.84, the parameter value is at the 95% confidence limit.

### Computer Simulations

Deterministic computer simulations using the covariate adjusted population PK model were performed to illustrate its clinical implications. First, we explored the time course of remifentanyl plasma concentration ( $C_p$ ) when the same absolute dose (*i.e.*, not weight adjusted) is administered intravenously to 25-yr-old subjects with different body weights (*i.e.*, 75 and 150 kg) and a height of 175 cm, and also to 75-kg subjects with different ages (*i.e.*, 25 and 75 yr old) and a height of 175 cm. The simulated dosing regimens were a 50- $\mu$ g bolus injection and a 15- $\mu$ g/min continuous infusion for 60 min.

Next, to illustrate the difference in remifentanyl dosing requirements for various body weights (ranging from 50 to 200 kg in a 50-yr-old subject, height of 175 cm) and ages (ranging from 25 to 75 yr old in a 75-kg subject, height 175 cm), we performed TCI simulations, which targeted a  $C_p$  of 5 ng/ml for 30 min. We also simulated the cumulative dosage required to achieve a  $C_p$  of 5 ng/ml for various ages and body weights for up to 300 min.

Finally, because the final covariate added to the model (relating FFM to volume of distribution of the second compartment [V2]) was associated with the smallest change in the NONMEM OFV, we explored through simulation the influence of differing FFM values (*i.e.*, 45, 55, and 65) on the predicted plasma concentrations (and doses) using the final model (wherein FFM is a covariate related to V2) and the penultimate model (*i.e.*, model 8 in table 3, where FFM is not a covariate for any parameter). We simulated bolus, infusion, and TCI administration to a 50-yr-old, 75-kg patient (with arbitrarily different FFM values for the final model, FFM of 45, 55, and 65). The simulated remifentanyl bolus was 50  $\mu$ g. The simulated remifentanyl infusion was 20  $\mu$ g/min for 20 min. The simulated TCI regimen was a 30-min infusion targeted to 5 ng/ml.

All of the simulations were implemented in PKPD Tools (Minto and Schnider, <http://www.pkpdtools.com>, accessed March 21, 2016).

## Results

### Data Set

The study population demographics for age and body weight are presented graphically in figure 1 (see also table 1). The demographic characteristics confirm a heterogeneous population, particularly regarding the covariates of interest (*i.e.*, body weight and age); BMI ranges from 16.1 to 73.7 and age from 20 to 85 yr. The population includes patients with extremely high body weight and BMI from the subjects of La Colla *et al.*<sup>15</sup> and Egan *et al.*<sup>13</sup> Numerous older subjects are also represented, particularly in the Minto *et al.*<sup>3</sup> and Egan *et al.*<sup>21</sup> data sets.

Not only are the demographic characteristics of the study population heterogeneous, but the dosing schemes are also highly variable in terms of method of administration and total dose. The dosing scheme, concentration range, sampling site, number of samples, sampling period, and volunteer/patient distribution for each study are shown in table 2. The dosing schemes included high-dose bolus injection, fixed-rate continuous infusion, and TCI infusion. All of the concentration measurements were made from arterial blood. The raw PK data, categorized by method of administration, are presented in figure 2.

### Population Modeling

The mixed-effects modeling analyses showed that the PKs were best described by a three-compartment model (clearance [CL1], intercompartmental clearances [CL2 and CL3], volume of the central compartment [V1], and volumes of peripheral compartments [V2 and V3]). The process of model development is presented in summary form in table 3, with OFVs and numerical performance measures for a two-compartment model, the base model, and for selected covariate-adjusted candidate models (hundreds of candidate models were tested). The parameter estimates and interindividual variability for the base model and the covariate adjusted final model are presented in table 4 (bootstrap median parameter values with CIs shown for the final model).

### Covariate Modeling

In the process of covariate model building, age, weight, and FFM were discovered to have an important influence on several model parameters. Sex had no influence on any model parameter (once body weight was incorporated into the model). Body weight was related to clearance (CL1) and central volume (V1) as a power function with a positive exponent smaller than one. Central clearance (CL1), fast intercompartmental clearance (CL2), and rapidly equilibrating and slowly equilibrating compartment volumes (V2 and V3) exhibited linear correlations with age. FFM was modeled into the fast compartment volume (V2) as a power function with a positive exponent smaller than one. The relationships between parameters and their related covariates are presented as Supplemental Digital Content 1 (<http://links.lww.com/ALN/B427>).

**Table 3.** A Summary of the Model Development Process Showing the Major Steps in Model Expansion by Covariates

| Model                                      | 1                                                          | 2                       | 3                       | 4                       | 5                       | 6                       | 7                      | 8                     | Final                  |
|--------------------------------------------|------------------------------------------------------------|-------------------------|-------------------------|-------------------------|-------------------------|-------------------------|------------------------|-----------------------|------------------------|
| V1                                         | 5.01                                                       | 4.72                    | 4.64                    | 4.77                    | 4.78                    | 4.80                    | 4.82                   | 4.73                  | 4.76                   |
| V2                                         | 8.77                                                       | 7.47                    | 7.28                    | 7.43                    | 7.42                    | 8.04                    | 8.22                   | 8.18                  | 8.40                   |
| V3                                         |                                                            | 3.46                    | 3.55                    | 3.50                    | 3.50                    | 3.76                    | 4.03                   | 4.13                  | 4.00                   |
| CL1                                        | 2.75                                                       | 2.71                    | 2.67                    | 2.68                    | 2.76                    | 2.77                    | 2.77                   | 2.76                  | 2.77                   |
| CL2                                        | 1.53                                                       | 1.78                    | 1.76                    | 1.90                    | 1.89                    | 1.94                    | 1.95                   | 1.95                  | 1.94                   |
| CL3                                        |                                                            | 0.201                   | 0.210                   | 0.207                   | 0.206                   | 0.229                   | 0.203                  | 0.205                 | 0.197                  |
| CL1 × (TBW/74.5) <sup>0</sup>              |                                                            |                         | 0.322                   | 0.316                   | 0.319                   | 0.315                   | 0.316                  | 0.327                 | 0.336                  |
| CL2 − [0 × (Age − 37)]                     |                                                            |                         |                         | 0.0244                  | 0.0243                  | 0.0286                  | 0.0280                 | 0.0280                | 0.0280                 |
| CL1 − [0 × (Age − 37)]                     |                                                            |                         |                         |                         | 0.0143                  | 0.0150                  | 0.0150                 | 0.0146                | 0.0149                 |
| V2 − [0 × (Age − 37)]                      |                                                            |                         |                         |                         |                         | 0.116                   | 0.107                  | 0.105                 | 0.0936                 |
| V3 − [0 × (Age − 37)]                      |                                                            |                         |                         |                         |                         |                         | 0.0482                 | 0.0524                | 0.0477                 |
| V1 × (TBW/74.5) <sup>0</sup>               |                                                            |                         |                         |                         |                         |                         |                        | 0.691                 | 0.658                  |
| V2 × (FFM/52.3) <sup>0</sup>               |                                                            |                         |                         |                         |                         |                         |                        |                       | 0.573                  |
| Additive coefficient of residual error     | 0.149                                                      | 0.0214                  | 0.0218                  | 0.0222                  | 0.0226                  | 0.0230                  | 0.0218                 | 0.0218                | 0.0217                 |
| Proportional coefficient of residual error | 0.161                                                      | 0.167                   | 0.167                   | 0.167                   | 0.167                   | 0.167                   | 0.167                  | 0.167                 | 0.168                  |
| MDAPE (%), (CI)                            | 28.2<br>(−3.4 × 10 <sup>5</sup> to 3.4 × 10 <sup>5</sup> ) | 25.6<br>(−14.3 to 65.4) | 23.5<br>(−21.7 to 68.7) | 23.6<br>(−23.4 to 70.6) | 22.4<br>(−42.4 to 87.2) | 21.7<br>(−38.7 to 82.2) | 22.1<br>(14.2 to 30.1) | 22<br>(14.9 to 29.2)  | 21.2<br>(14.0 to 28.4) |
| MDPE (%), (CI)                             | 9.8<br>(−3.4 × 10 <sup>5</sup> to 3.4 × 10 <sup>5</sup> )  | 4.2<br>(−35.6 to 44.1)  | 3.2<br>(−42.0 to 48.4)  | 2.4<br>(−44.6 to 49.4)  | 2.6<br>(−62.2 to 67.4)  | 2.7<br>(−57.8 to 63.2)  | 3.4<br>(−4.6 to 11.4)  | 3.1<br>(−4.1 to 10.4) | 2.5<br>(−4.7 to 9.8)   |
| DFV                                        | 7277.789                                                   | 6537.684                | 6498.766                | 6459.782                | 6421.625                | 6381.467                | 6354.112               | 6331.04               | 6318.841               |
| ΔOFV (compared with previous)              |                                                            |                         | −38.92                  | −38.99                  | −38.16                  | −40.16                  | −27.36                 | −23.07                | −12.2                  |

ΔO<sub>FV</sub> less than -6.63 indicates statistical significance ( $P < 0.01$ ).

CL1 = clearance of central compartment; CL2, CL3 = intercompartmental clearances; FFM = fat-free mass; MDAPE = median absolute performance error (model inaccuracy); MDPE = median performance error (model bias); Model 1 = two-compartmental model; Model 2 = three-compartmental base model; Models 3, 4, 5, 6, 7, 8, and final = covariate adjusted models; OFV = objective function value;  $\Delta$ OFV = change in OFV compared to prior model; TBW = total body weight; V1 = volume of central compartment; V2, V3 = volumes of peripheral compartments.

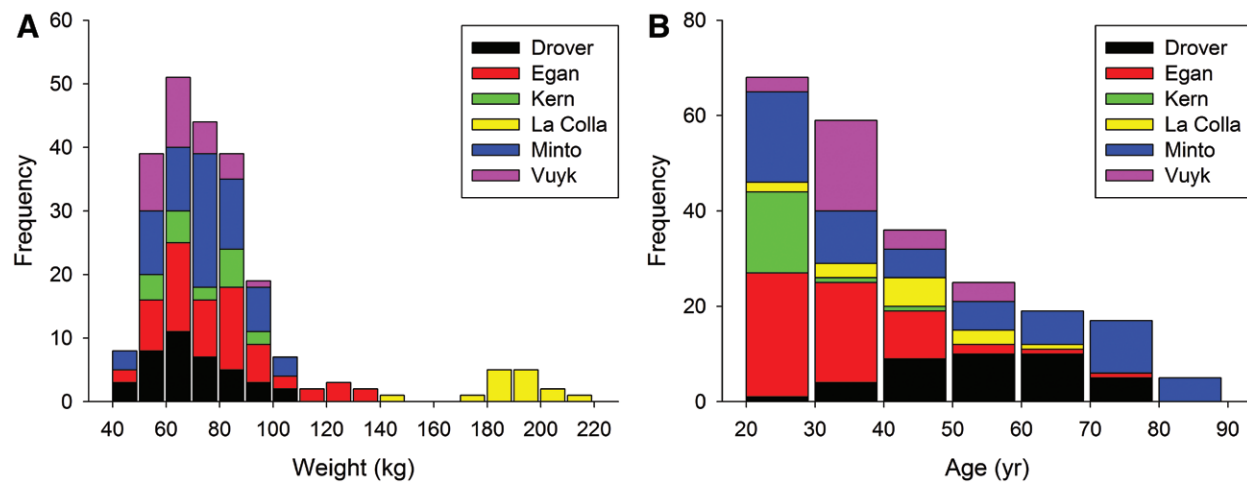

**Fig. 1.** Bar plots of the demographic make-up of the dataset for body weight (A) and age (B). Different studies/authors are represented with different colors.

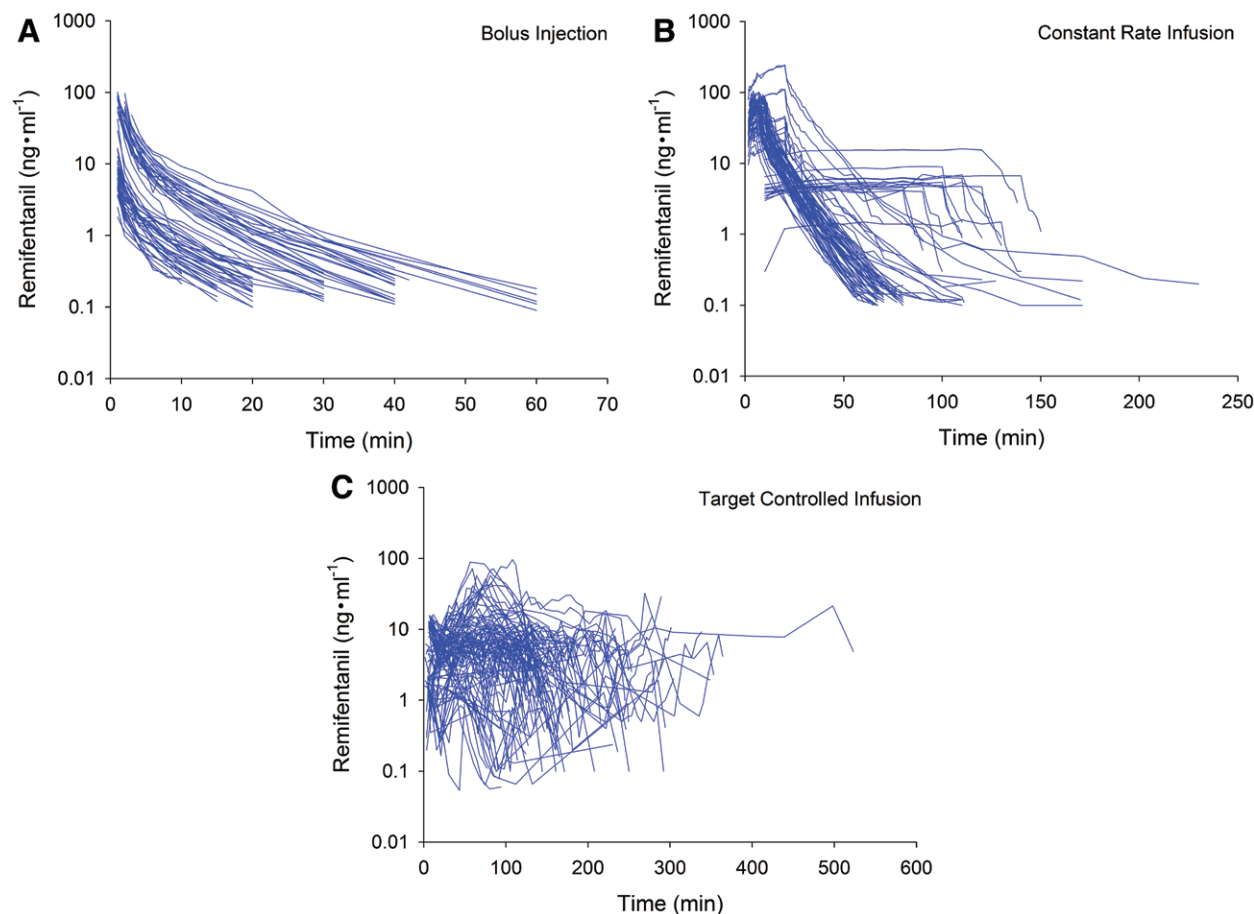

**Fig. 2.** The raw pharmacokinetic data categorized into bolus (A), constant rate infusion (B), and target-controlled infusion (C) administration schemes. The vertical axis is on a log scale.

### Model Evaluation

The observed *versus* predicted remifentanyl concentrations for the final population model and the *post hoc* individual models are presented in figure 3. Similar plots for the penultimate model (*i.e.*, model 8 in table 3) are

presented as Supplemental Digital Content 2 (<http://links.lww.com/ALN/B428>). The CWRES as a function of time for the final population PK model are presented in figure 4. The percentage of CWRES outside of the  $\pm 2$  range is 4.93%. The MDPE and MDAPE with CIs are presented

**Table 4.** Population Pharmacokinetic Parameter Estimates, Interindividual Variability (%CV), and Median Parameter Values (2.5 to 97.5% CIs) of the Nonparametric Bootstrap Replicates of the Final Pharmacokinetic Model (Base Model Parameter Values Also Shown)

| Model | Parameter                                  | Estimate (%CV)                                                                                                                                                            | Median (2.5 to 97.5% CI)                                          |
|-------|--------------------------------------------|---------------------------------------------------------------------------------------------------------------------------------------------------------------------------|-------------------------------------------------------------------|
| Base  | V1                                         | 4.72 (61.0)                                                                                                                                                               |                                                                   |
|       | V2                                         | 7.47 (67.2)                                                                                                                                                               |                                                                   |
|       | V3                                         | 3.46 (63.6)                                                                                                                                                               |                                                                   |
|       | CL1                                        | 2.71 (25.3)                                                                                                                                                               |                                                                   |
|       | CL2                                        | 1.78 (50.1)                                                                                                                                                               |                                                                   |
|       | CL3                                        | 0.201 (58.1)                                                                                                                                                              |                                                                   |
|       | Additive coefficient of residual error     | 0.0214                                                                                                                                                                    |                                                                   |
| Final | Proportional coefficient of residual error | 0.167                                                                                                                                                                     |                                                                   |
|       | V1                                         | $\theta_1 \times (\text{TBW} / 74.5)^{\theta_9}$ (53.6)<br>$\theta_1 = 4.76$<br>$\theta_9 = 0.658$                                                                        | 4.8 (4.31–5.31)<br>0.661 (0.432–0.882)                            |
|       | V2                                         | $\theta_2 \times (\text{FFM} / 52.3)^{\theta_{10}} - \theta_{11} \times (\text{AGE} - 37)$ (56.3)<br>$\theta_2 = 8.4$<br>$\theta_{10} = 0.573$<br>$\theta_{11} = 0.0936$  | 8.50 (7.31–9.80)<br>0.569 (0.283–0.867)<br>0.0934 (0.0650–0.1270) |
|       | V3                                         | $\theta_3 - \theta_{12} \times (\text{AGE} - 37)$ (59)<br>$\theta_3 = 4$<br>$\theta_{12} = 0.0477$                                                                        | 3.91 (2.94–4.91)<br>0.0476 (0.0297–0.0687)                        |
|       | CL1                                        | $\theta_4 \times (\text{TBW} / 74.5)^{\theta_{13}} - \theta_{14} \times (\text{AGE} - 37)$ (21.2)<br>$\theta_4 = 2.77$<br>$\theta_{13} = 0.336$<br>$\theta_{14} = 0.0149$ | 2.77 (2.68–2.87)<br>0.335 (0.265–0.410)<br>0.0149 (0.0107–0.0188) |
|       | CL2                                        | $\theta_5 - \theta_{15} \times (\text{AGE} - 37)$ (41.2)<br>$\theta_5 = 1.94$<br>$\theta_{15} = 0.0280$                                                                   | 1.93 (1.73–2.16)<br>0.0276 (0.0211–0.0345)                        |
|       | CL3                                        | $\theta_6 = 0.197$ (59)                                                                                                                                                   | 0.185 (0.107–0.279)                                               |
|       | Additive coefficient of residual error     | 0.0217                                                                                                                                                                    | 0.0212 (0.0105–0.0302)                                            |
|       | Proportional coefficient of residual error | 0.168                                                                                                                                                                     | 0.167 (0.15–0.185)                                                |

Interindividual random variability and residual random variability were modeled using a log-normal model and an additive and proportional coefficient of variation model, respectively. Nonparametric bootstrap analysis was repeated 2,000 times.

CL1 = clearance of central compartment; CL2, CL3 = intercompartmental clearances; CI = confidence interval; CV = coefficient of variation; FFM = lean body mass calculated by Janmahasatian *et al.*<sup>24</sup> formula; TBW = total body weight; V1 = volume of central compartment; V2, V3 = volumes of peripheral compartments.

in table 5 (and also for the Minto and La Colla models). Compared with the Minto and La Colla models, the final model has minimal bias (for MDPE, the Minto and La Colla model CI excludes 0, an indicator of bias). The results of the 2-fold cross-validation procedure are also presented in table 5; the values differ minimally with the original values. Plots of the *post hoc*  $\eta$ s for CL1 *versus* weight and CL1 *versus* age for the base and final models are presented as Supplemental Digital Content 3 (<http://links.lww.com/ALN/B429>).

The coefficients of variation and the CIs (according to the bootstrap procedure) of the parameter estimates for the final model are presented in table 4. The median values produced from the bootstrap procedure are close to the estimated parameters. Reduction of the coefficients of variation of parameters was achieved in the final model compared with the base model except for the slow intercompartmental clearance.

The LLP plots are presented in figure 5 for all of the estimated parameters in the final model. This LLP analysis suggests that the parameters were estimated with adequate precision (*i.e.*, no major problems with parameter identification).

### Computer Simulations

The same-dose simulations are presented in figure 6. Given the same dose, an obese patient is expected to achieve modestly lower remifentanyl plasma concentrations than a lean patient of the same age (fig. 6A). Conversely, an older patient is expected to achieve substantially higher plasma concentrations than a younger patient of the same body weight after an identical dose (fig. 6B).

The changes in dosing requirements over time for a range of body weights and ages when targeting a remifentanyl  $C_p$  of



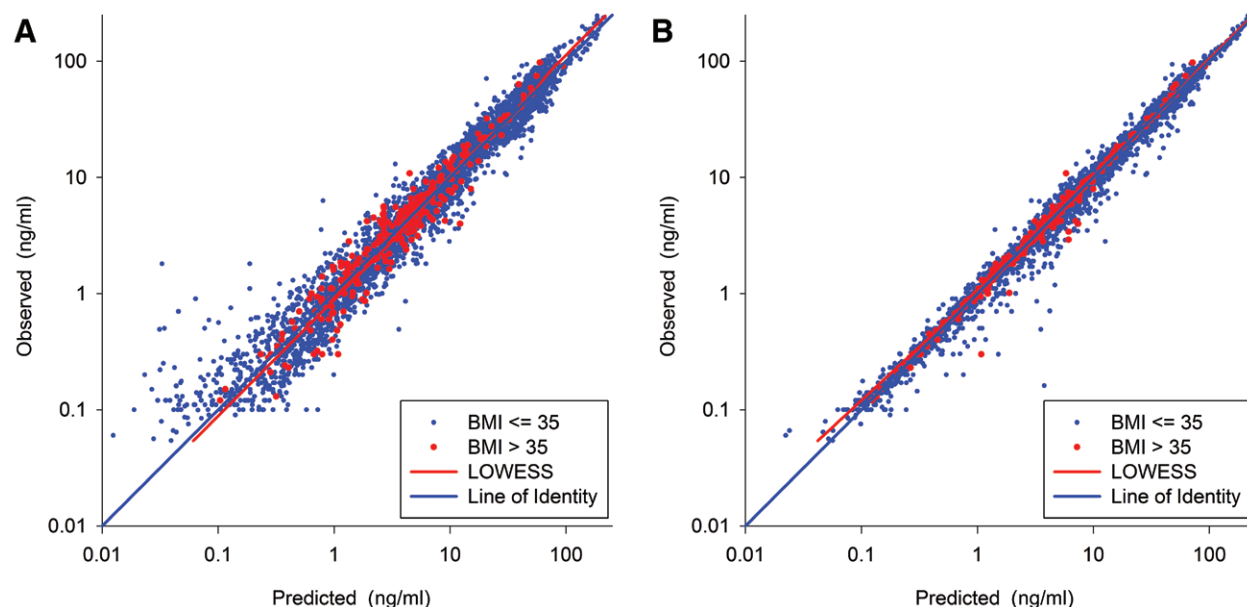

**Fig. 3.** Observed versus predicted remifentanyl concentrations for the final population model (A) and the *post hoc* individual models (B). Blue dots indicate concentrations for subjects with a body mass index (BMI) of 35 or less. Red dots indicate subjects with a BMI above 35. The lines of identity are shown in blue; locally weighted scatterplot smoothing (LOWESS) lines are in red.

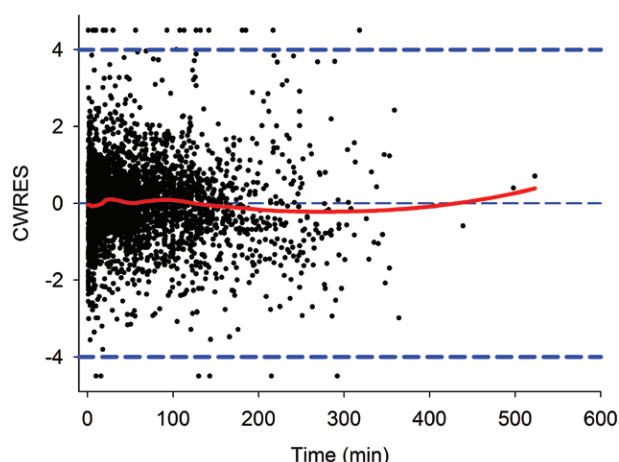

**Fig. 4.** The conditional weighted residuals (CWRES) as a function of time for the final population pharmacokinetic model. CWRES values are in black; a locally weighted scatterplot smoothing line is in red. A dashed blue line marks the zero point. Bold dashed blue lines mark  $\pm 4$ ; for ease of presentation, data outside of blue lines are displayed as dots at  $\pm 4.5$ .

5 ng/ml by TCI are presented in figure 7 (fig. 7A for weight and 7B for age). Because of the relatively high clearance of remifentanyl, the infusion rate required stabilizes approximately 25 min after beginning the infusions. The increased dose requirements for the younger and heavier patients are evident.

The cumulative dose requirement to maintain a  $C_p$  of 5 ng/ml by TCI simulation is presented in figure 8. For a 5-h infusion, compared with the younger-leaner patient (*i.e.*, 25 yr old, 75 kg), the heavier (150 kg) 25-yr-old's cumulative

dosage requirement is approximately 125% of the younger-leaner patient's dose. Conversely, the older (75 yr old) 75-kg patient's cumulative dosage requirement is approximately 75% of the younger-leaner patient's dose. Table 6 presents how dosing requirements vary by body weight for infusions of up to 2 h (for a 175-cm 25 yr old).

The simulations comparing the penultimate model (model 8 in table 3) with the final model for differing FFM values in an otherwise identical patient are presented as Supplemental Digital Content 4 (<http://links.lww.com/ALN/B430>). As expected, the differences between the model predictions are slight. These simulations must be interpreted with caution, because assuming such a wide range of FFM in a 75-kg patient is somewhat artificial.

## Discussion

The aim of the current investigation was to develop a new population PK model for remifentanyl that would adequately characterize the influence of body weight (among other covariates, *e.g.*, age) on the disposition of remifentanyl in the general adult population. We hypothesized that age and various indices of body mass would be important covariates in the new model. This hypothesis was confirmed.

That remifentanyl PKs are influenced by obesity and age is of course not new. This work extends the findings of previous investigators, such as Minto *et al.*,<sup>3</sup> La Colla *et al.*,<sup>15</sup> and Egan *et al.*,<sup>13,21</sup> by including data from a larger number of subjects with a broader range of body weight and age and a more diverse array of drug infusion schemes, including TCIs. Compared with the data sets for typical descriptive PK studies in anesthesiology, a model derived from more

**Table 5.** Bias and Inaccuracy of the Final Model (with Comparison to the Minto and La Colla Models)

| Model         | MDPE (%)                  |                           |                        | MDAPE (%)              |                        |                        |
|---------------|---------------------------|---------------------------|------------------------|------------------------|------------------------|------------------------|
|               | Minto <sup>3</sup>        | La Colla <sup>15</sup>    | Current Study          | Minto <sup>3</sup>     | La Colla <sup>15</sup> | Current Study          |
| Total         | -7.2<br>(-11.2 to -3.0)   | -7.3<br>(-11.3 to -3.2)   | 2.5<br>(-4.7 to 9.8)*  | 22.3<br>(18.2 to 26.3) | 20.9<br>(16.9 to 24.9) | 21.2<br>(14.0 to 28.4) |
| Twofold cross |                           |                           | 2.8<br>(-0.2 to 5.8)*  |                        |                        | 21.7<br>(18.7 to 24.7) |
| BMI ≤ 35      | -4.5<br>(-9.0 to -0.1)    | -6.5<br>(-10.9 to -2.1)   | 2.3<br>(-5.6 to 10.1)* | 20.5<br>(16.1 to 24.8) | 20.7<br>(16.4 to 25.0) | 21.3<br>(13.5 to 29.1) |
| BMI > 35      | -37.7<br>(-40.1 to -35.4) | -16.1<br>(-18.3 to -14.0) | 7.1<br>(4.5 to 9.7)    | 43.1<br>(41.4 to 44.9) | 23.6<br>(21.9 to 25.3) | 20<br>(17.8 to 22.0)   |
| Age ≤ 65 yr   | -7.4<br>(-12.2 to -2.7)   | -7.3<br>(-11.9 to -2.6)   | 2.2<br>(-6.1 to 10.5)* | 22.9<br>(18.3 to 27.5) | 21.2<br>(16.6 to 25.8) | 21.3<br>(13.0 to 29.6) |
| Age > 65 yr   | -5.3<br>(-7.5 to -3.2)    | -7.2<br>(-9.6 to -4.9)    | 5.6<br>(1.9 to 9.3)    | 18.2<br>(16.5 to 19.9) | 19<br>(17.2 to 20.8)   | 20.2<br>(17.0 to 23.4) |

Data show MDPE (95% CI) and MDAPE (95% CI).

\*A 95% CI of MDPE does not exclude 0; for twofold cross, see explanation in text.

BMI = body mass index; MDAPE = median absolute prediction error; MDPE = median prediction error.

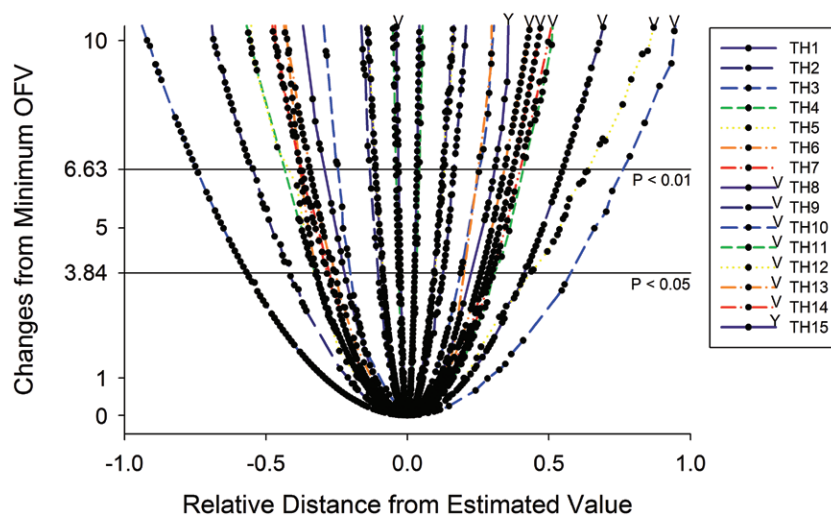

**Fig. 5.** Log-likelihood profile plots for all estimated parameters in the final model. The *horizontal* axis is expressed as a relative scale to the final estimates, which were converted to 0. The relative distance was calculated as follows: (observed value – estimated parameter)/estimated parameter. The lines  $P = 0.05$  and  $P = 0.01$  correspond with a  $-2$  log-likelihood difference of 3.84 and 6.63, respectively, from the maximum likelihood of the final model estimate. Black dots indicate the increments between computations. OFV = objective function value; TH =  $\theta$  (from NONMEM nomenclature; Icon Development Solutions, USA); V and Y = markers to differentiate lines with similar colors and line patterns for clarity.

than 225 subjects and nearly 4,500 arterial blood samples is a large, comprehensive study. Overcoming the limitations associated with the faulty James' equations for the computation of lean body mass constitutes a simple but important advance of the existing knowledge.

From a practical perspective, PK models have at least two important applications.<sup>30</sup> First, the models can be the basis for PK simulations to address clinically important questions regarding the optimal dosage scheme for a given patient (*i.e.*, posologic optimization). An extension of this application is the incorporation of the models into clinical pharmacology display systems for clinical and educational use.<sup>31,32</sup> Second, PK models can be incorporated into TCI pumps for

the automated administration of intravenous anesthetics, enabling practice in the concentration domain.<sup>33</sup>

In terms of the practical treatment of obese patients, the application of this new PK model is straightforward. Using total body weight (TBW) as a weight-proportional approach to calculate the drug administration scheme in severely obese patients is suboptimal. Compared with lean subjects, severely obese patients do indeed require more remifentanyl to achieve a specified remifentanyl target concentration. However, in considerably obese patients, the dosage increase does not correlate linearly with their TBW (in fact, it is not even a close approximation of a linear increase). This is consistent with existing information about the influence

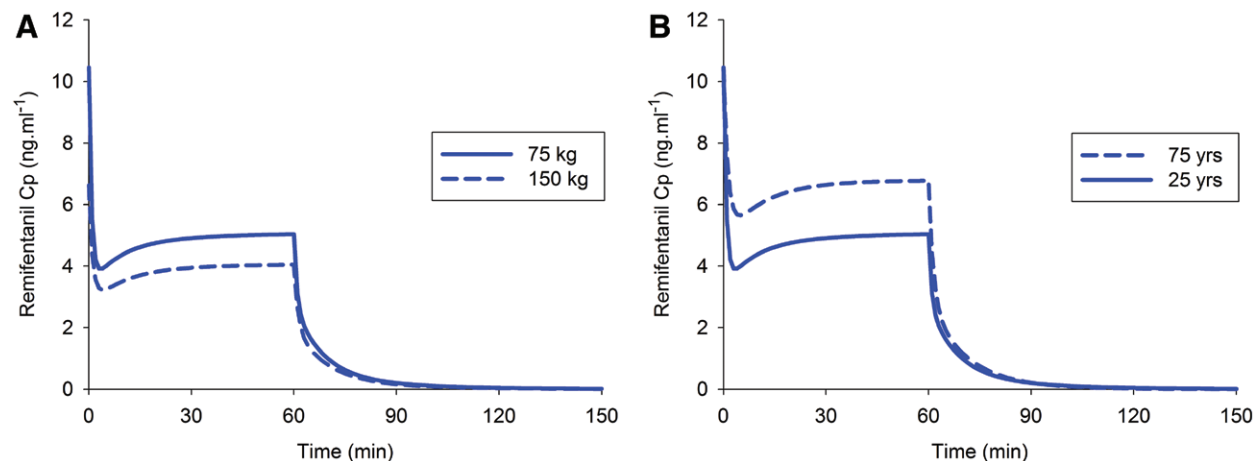

**Fig. 6.** Deterministic computer simulations of the final model plasma concentration ( $C_p$ ) predictions versus time for an identical dose (i.e., not weight adjusted) administered intravenously to 75- and 150-kg subjects both age 25 yr, height 175 cm (A), and to 25-yr-old and 75-yr-old subjects both weighing 75 kg, height 175 cm (B). The simulated dosing regimens were a 50- $\mu$ g bolus injection and a 15- $\mu$ g/min continuous infusion for 60 min.

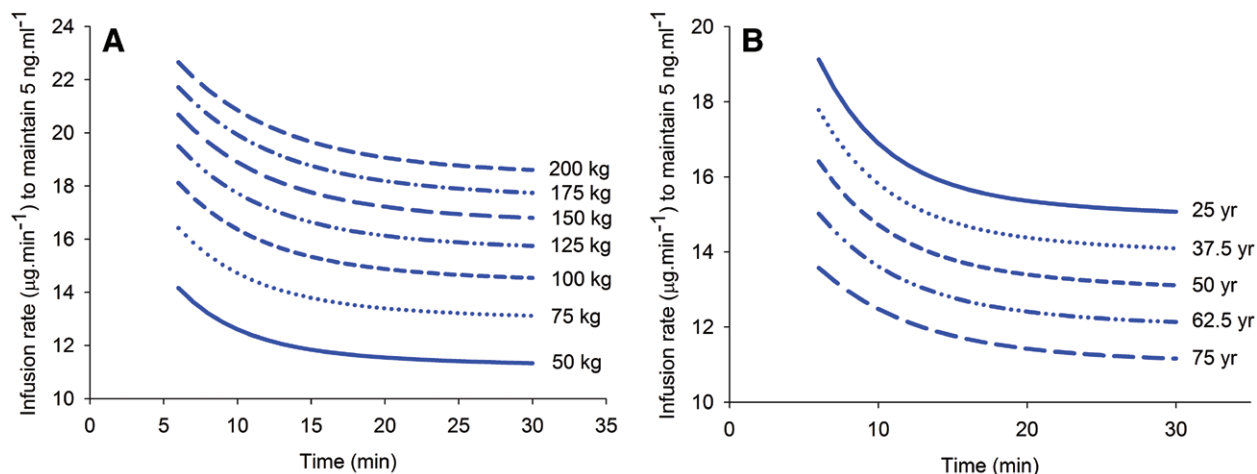

**Fig. 7.** Changes in dosing requirements over time for a range of body weights assuming an age of 50 yr, height 175 cm (A) and a range of ages assuming a body weight of 75 kg, height 175 cm (B) when targeting a remifentanyl plasma concentration of 5 ng/ml by target-controlled infusion according to the final model.

of body weight on remifentanyl disposition.<sup>13,15</sup> According to the current study, although obesity does indeed influence remifentanyl PKs, it is not necessary to relate basic or direct obesity indices, such as BMI, as a covariate to any of the PK model parameters. A model that incorporates TBW, fat-free mass, and age as covariates is sufficiently accurate, even for obese patients.

From a theoretical perspective, the scientific underpinnings of this relationship between PK model parameters and body weight are a function of well-characterized anatomic realities. In obese patients, as body mass increases, fatty tissue increases more than lean body mass; that is, there is a nonlinear relationship between TBW and lean body mass.<sup>34</sup> Lean body mass, especially as it relates to clearance and metabolism, is more relevant pharmacologically than fatty tissue, although fat is thought to be an important reservoir for drug distribution for fat-soluble drugs.<sup>35</sup> Because remifentanyl is

metabolized in blood and tissue by nonspecific esterases that are presumably widely expressed in the body,<sup>36</sup> it is conceivable that TBW is perhaps more relevant to the metabolism of remifentanyl than drugs that require delivery to a metabolic organ like the liver; that TBW is a covariate in the final model is consistent with this speculative assertion.

Recent advances in understanding the disposition of propofol in the obese patient population are instructive to put the current findings in proper context. Cortínez *et al.*<sup>37</sup> reported an allometric scaling relationship between propofol elimination (and intercompartmental clearances) and TBW (i.e.,  $TBW^{3/4}$ ). In a much larger and comprehensive study of numerous propofol data sets pooled together, Eleveld *et al.*<sup>30</sup> confirmed the use of allometric scaling of propofol clearance parameters. In contrast, in a clinical study, Ingrande *et al.*<sup>38</sup> concluded that lean body weight was the optimal basis for the calculation of the propofol induction dose. A

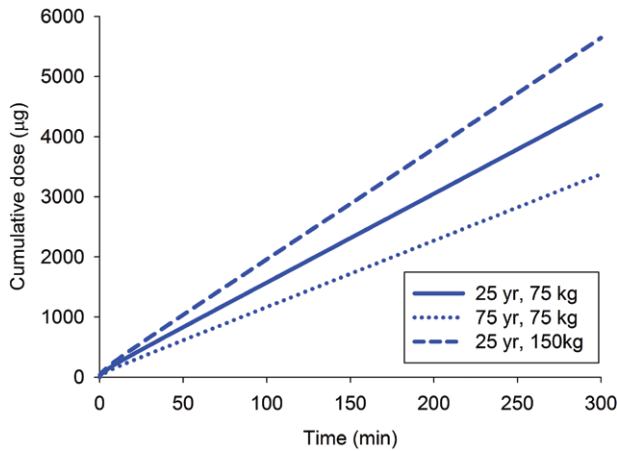

**Fig. 8.** Cumulative remifentanyl doses (in  $\mu\text{g}$ ) to achieve and maintain a plasma concentration of 5 ng/ml over time when administered by target-controlled infusion for a 25-yr-old, 75-kg subject (solid line), a 75-yr-old, 75-kg subject (dotted line), and a 25-yr-old, 150-kg subject (dashed line) according to the final model. All subjects for these simulations are assumed to be 175 cm tall.

sophisticated simulation study by McLeay *et al.*<sup>39</sup> also concluded that lean body weight was a useful descriptor for the determination of propofol dosing schemes. In general, although these studies have nuanced differences regarding how best to include the influence of obesity into an optimized PK model for propofol, they all confirm the fundamental principle that TBW is not an optimal scalar for the calculation of propofol dosing schemes. The current study findings about remifentanyl are in general agreement with these observations for propofol.

Investigators in this arena have focused considerable attention on allometric scaling of PK parameters to body weight. In general terms, allometry is the study of the relationship between body size and body anatomical and physiologic properties. The theoretical foundation of allometric scaling in PKs is loosely based on Kleiber's law, which relates the body size of numerous species to metabolic rate using a  $3/4$  power function (*i.e.*, metabolic rate is proportional to  $\text{TBW}^{3/4}$ ). Extending this idea into PKs, numerous investigators have advocated scaling PK clearance parameters to  $\text{TBW}^{3/4}$ .<sup>12,40</sup> As noted, this approach has been successful for propofol.<sup>30,37</sup> There is controversy in the literature about

how best to implement some form of allometric scaling in PK models.<sup>41</sup> The current study took a hybrid approach, estimating the exponent of the power scaling as part of the model building (*i.e.*, rather than using a  $3/4$  power function). In other words, the current study relied exclusively on the data to determine the structure of the model, including the linear or power scaling of the covariates, rather than applying these allometric scaling principles from the outset. This approach is consistent with a recent editorial cautioning blind adherence to allometric PK model building strategies when the raw data do not support it.<sup>42</sup>

Several limitations of this investigation deserve emphasis. The most obvious limitation is that the study does not include a PD component. PKs cannot be considered in isolation, so the study conclusions must be understood in the context of existing knowledge regarding remifentanyl PDs. Remifentanyl PDs are not thought to be influenced by obesity, and the influence of advancing age on remifentanyl PDs is well characterized.<sup>3</sup> However, how to predict effect-site concentrations using the PK model of the current study is a conundrum, because we do not have a  $k_{\text{e0}}$  parameter (elimination rate constant from the effect-site) estimated from this data set. Using the time of peak effect after bolus administration is one approach to this problem.<sup>43</sup>

Another significant limitation of this study relates to the remifentanyl blood samples that were below the quantitation limit (BQL) of the assay. It is well known that some methods used to handle the BQL values can introduce bias into model parameter estimates, especially where the data sets are sparsely sampled.<sup>44,45</sup> Because the current study relied on data from numerous investigators and studies, some of which were published many years ago, it was not possible for us to determine with confidence how many samples were BQL, although we believe that, relative to the total number of samples, the number of BQL samples was very small (perhaps less than 2%) and that all of the studies had a similar limit of quantitation. We elected to use all of the data from the published studies because we did not have a rational basis to censor the data further. There is no question that combining several studies that used different analytical chemistry techniques and laboratories may have influenced the final model because of assay measurement error and that this issue is especially relevant to BQL samples (or samples that are at or near the limit of quantitation).

**Table 6.** Total Dose Requirement (in  $\mu\text{g}$ ) to Maintain a Plasma Concentration of 5 ng/ml by Target-controlled Infusion for Infusions of Varying Lengths (0.5 to 120 min) in Patients with Different Body Weights

| Body Weight | Time (min) |      |      |       |       |       |        |        |
|-------------|------------|------|------|-------|-------|-------|--------|--------|
|             | 0.5        | 1    | 2    | 5     | 10    | 30    | 60     | 120    |
| 75 kg       | 35.1       | 47.8 | 71.8 | 134.7 | 223.3 | 532.7 | 980.6  | 1868.7 |
| 100 kg      | 40.6       | 54.2 | 79.7 | 147.8 | 244.8 | 583.8 | 1074   | 2046.6 |
| 125 kg      | 45.7       | 59.9 | 86.8 | 159   | 263   | 626.8 | 1152.8 | 2196.9 |
| 150 kg      | 50.4       | 65.1 | 93.1 | 168.9 | 278.8 | 664.5 | 1221.7 | 2328.2 |

Simulations based on a 175-cm, 25-yr-old man with drug administration by target-controlled infusion according to the final pharmacokinetic model.



Other limitations include the absence of pediatric data, making the model unsuitable for use in younger patients. Other covariate effects that might be of interest were also not examined, including subject type (volunteer *vs.* patient). Effects for these covariates have been described for propofol.<sup>30</sup> Although in preliminary models we identified a very modest covariate effect for subject type (volunteer *vs.* patient), we did not pursue this covariate effect in the final model in part because all of the obese subjects were patients, and we were concerned about this confounding influence (our main goal was to focus on the influence of obesity).

The next steps in this line of investigation obviously include prospective validation of the new PK model. Assessment of the predictive performance in various subgroups would also be enlightening. Finally, there is considerable work to do in illustrating the clinical implications of the new PK model through simulation.

The general question of how to handle dosing calculations in very obese patients has important implications for drug development in all therapeutic areas. Given the prevalence of obesity in the modern patient population, particularly in developed countries like the United States, the development of a drug label should include information about how dosing schemes should be modified with increasing body weight.<sup>46,47</sup> This is perhaps even more important in anesthesiology, where drugs of low therapeutic index are common. The current study provides a rational basis to address these obesity-related posologic issues for remifentanyl.

In summary, we report a new PK model for remifentanyl estimated from a large, diverse data set that adequately characterizes the influence of body weight and age on the disposition of remifentanyl in a general adult population. The model is suitable for use in TCI systems and pharmacologic simulation software. The model requires prospective validation before widespread use.

## Research Support

Support was provided solely from institutional and/or departmental sources.

## Competing Interests

The authors declare no competing interests.

## Correspondence

Address correspondence to Dr. Egan: Department of Anesthesiology, SOM 3C444, 30 North 1900 East, Salt Lake City, Utah 84132. [talmage.egan@hsc.utah.edu](mailto:talmage.egan@hsc.utah.edu). Information on purchasing reprints may be found at [www.anesthesiology.org](http://www.anesthesiology.org) or on the masthead page at the beginning of this issue. ANESTHESIOLOGY's articles are made freely accessible to all readers, for personal use only, 6 months from the cover date of the issue.

## References

1. Egan TD, Lemmens HJ, Fiset P, Hermann DJ, Muir KT, Stanski DR, Shafer SL: The pharmacokinetics of the new short-acting

opioid remifentanyl (GI87084B) in healthy adult male volunteers. ANESTHESIOLOGY 1993; 79:881-92

2. Egan TD, Minto CF, Hermann DJ, Barr J, Muir KT, Shafer SL: Remifentanyl *versus* alfentanil: Comparative pharmacokinetics and pharmacodynamics in healthy adult male volunteers. ANESTHESIOLOGY 1996; 84:821-33
3. Minto CF, Schnider TW, Egan TD, Youngs E, Lemmens HJ, Gambus PL, Billard V, Hoke JF, Moore KH, Hermann DJ, Muir KT, Mandema JW, Shafer SL: Influence of age and gender on the pharmacokinetics and pharmacodynamics of remifentanyl. I. Model development. ANESTHESIOLOGY 1997; 86:10-23
4. Mertens MJ, Engbers FH, Burm AG, Vuyk J: Predictive performance of computer-controlled infusion of remifentanyl during propofol/remifentanyl anaesthesia. Br J Anaesth 2003; 90:132-41
5. Hoke JF, Shlugman D, Dershwitz M, Michałowski P, Malthouse-Dufore S, Connors PM, Martel D, Rosow CE, Muir KT, Rubin N, Glass PS: Pharmacokinetics and pharmacodynamics of remifentanyl in persons with renal failure compared with healthy volunteers. ANESTHESIOLOGY 1997; 87:533-41
6. Dershwitz M, Hoke JF, Rosow CE, Michałowski P, Connors PM, Muir KT, Dienstag JL: Pharmacokinetics and pharmacodynamics of remifentanyl in volunteer subjects with severe liver disease. ANESTHESIOLOGY 1996; 84:812-20
7. Bouillon TW, Bruhn J, Radulescu L, Andresen C, Shafer TJ, Cohane C, Shafer SL: Pharmacodynamic interaction between propofol and remifentanyl regarding hypnosis, tolerance of laryngoscopy, bispectral index, and electroencephalographic approximate entropy. ANESTHESIOLOGY 2004; 100:1353-72
8. Kern SE, Xie G, White JL, Egan TD: A response surface analysis of propofol-remifentanyl pharmacodynamic interaction in volunteers. ANESTHESIOLOGY 2004; 100:1373-81
9. Manyam SC, Gupta DK, Johnson KB, White JL, Pace NL, Westenskow DR, Egan TD: Opioid-volatile anesthetic synergy: A response surface model with remifentanyl and sevoflurane as prototypes. ANESTHESIOLOGY 2006; 105:267-78
10. Johnson KB, Syroid ND, Gupta DK, Manyam SC, Egan TD, Huntington J, White JL, Tyler D, Westenskow DR: An evaluation of remifentanyl propofol response surfaces for loss of responsiveness, loss of response to surrogates of painful stimuli and laryngoscopy in patients undergoing elective surgery. Anesth Analg 2008; 106:471-9
11. Johnson KB, Syroid ND, Gupta DK, Manyam SC, Pace NL, LaPierre CD, Egan TD, White JL, Tyler D, Westenskow DR: An evaluation of remifentanyl-sevoflurane response surface models in patients emerging from anesthesia: Model improvement using effect-site sevoflurane concentrations. Anesth Analg 2010; 111:387-94
12. Coetzee JF: Allometric or lean body mass scaling of propofol pharmacokinetics: towards simplifying parameter sets for target-controlled infusions. Clin Pharmacokinet 2012; 51:137-45
13. Egan TD, Huizinga B, Gupta SK, Jaarsma RL, Sperry RJ, Yee JB, Muir KT: Remifentanyl pharmacokinetics in obese *versus* lean patients. ANESTHESIOLOGY 1998; 89:562-73
14. La Colla L, Albertin A, La Colla G: Pharmacokinetic model-driven remifentanyl administration in the morbidly obese: the 'critical weight' and the 'fictitious height,' a possible solution to an unsolved problem? Clin Pharmacokinet 2009; 48:397-8
15. La Colla L, Albertin A, La Colla G, Porta A, Aldegheri G, Di Candia D, Gigli F: Predictive performance of the 'Minto' remifentanyl pharmacokinetic parameter set in morbidly obese patients ensuing from a new method for calculating lean body mass. Clin Pharmacokinet 2010; 49:131-9
16. Berrington de Gonzalez A, Hartge P, Cerhan JR, Flint AJ, Hannan L, MacInnis RJ, Moore SC, Tobias GS, Anton-Culver H, Freeman LB, Beeson WL, Clipp SL, English DR, Folsom AR, Freedman DM, Giles G, Hakansson N, Henderson KD,



- Hoffman-Bolton J, Hoppin JA, Koenig KL, Lee IM, Linet MS, Park Y, Pocobelli G, Schatzkin A, Sesso HD, Weiderpass E, Willcox BJ, Wolk A, Zeleniuch-Jacquotte A, Willett WC, Thun MJ: Body-mass index and mortality among 1.46 million white adults. *N Engl J Med* 2010; 363:2211–9
17. Caballero B: The global epidemic of obesity: An overview. *Epidemiol Rev* 2007; 29:1–5
  18. Whitlock G, Lewington S, Sherliker P, Clarke R, Emberson J, Halsey J, Qizilbash N, Collins R, Peto R: Body-mass index and cause-specific mortality in 900 000 adults: Collaborative analyses of 57 prospective studies. *Lancet* 2009; 373:1083–96
  19. Buchwald H, Oien DM: Metabolic/bariatric surgery worldwide 2011. *Obes Surg* 2013; 23:427–36
  20. Coetzee JF: Total intravenous anaesthesia to obese patients: Largely guesswork? *Eur J Anaesthesiol* 2009; 26:359–61
  21. Egan TD, Kern SE, Muir KT, White J: Remifentanyl by bolus injection: a safety, pharmacokinetic, pharmacodynamic, and age effect investigation in human volunteers. *Br J Anaesth* 2004; 92:335–43
  22. Drover DR, Lemmens HJ: Population pharmacodynamics and pharmacokinetics of remifentanyl as a supplement to nitrous oxide anesthesia for elective abdominal surgery. *ANESTHESIOLOGY* 1998; 89:869–77
  23. Kern SE, Xie G, White JL, Egan TD: Opioid-hypnotic pharmacodynamic synergy: A response surface analysis of propofol-remifentanyl pharmacodynamic interaction in volunteers. *ANESTHESIOLOGY* 2004; 100:1373–81.
  24. Janmahasatian S, Duffull SB, Ash S, Ward LC, Byrne NM, Green B: Quantification of lean bodyweight. *Clin Pharmacokinet* 2005; 44:1051–65
  25. Jonsson EN, Karlsson MO: Automated covariate model building within NONMEM. *Pharm Res* 1998; 15:1463–8
  26. Hooker AC, Staatz CE, Karlsson MO: Conditional weighted residuals (CWRES): A model diagnostic for the FOCE method. *Pharm Res* 2007; 24:2187–97
  27. Jonsson EN, Karlsson MO: Xpose: An S-PLUS based population pharmacokinetic/pharmacodynamic model building aid for NONMEM. *Comput Methods Programs Biomed* 1999; 58:51–64
  28. Varvel JR, Donoho DL, Shafer SL: Measuring the predictive performance of computer-controlled infusion pumps. *J Pharmacokinet Biopharm* 1992; 20:63–94
  29. Parke J, Holford NH, Charles BG: A procedure for generating bootstrap samples for the validation of nonlinear mixed-effects population models. *Comput Methods Programs Biomed* 1999; 59:19–29
  30. Eleveld DJ, Proost JH, Cortínez LI, Absalom AR, Struys MM: A general purpose pharmacokinetic model for propofol. *Anesth Analg* 2014; 118:1221–37
  31. Gin T: Clinical pharmacology on display. *Anesth Analg* 2010; 111:256–8
  32. Struys MM, De Smet T, Mortier EP: Simulated drug administration: An emerging tool for teaching clinical pharmacology during anesthesiology training. *Clin Pharmacol Ther* 2008; 84:170–4
  33. Egan TD: Target-controlled drug delivery: Progress toward an intravenous “vaporizer” and automated anesthetic administration. *ANESTHESIOLOGY* 2003; 99:1214–9
  34. Ingrande J, Lemmens HJ: Dose adjustment of anaesthetics in the morbidly obese. *Br J Anaesth* 2010; 105(suppl 1):i16–23
  35. Wada DR, Björkman S, Ebling WF, Harashima H, Harapat SR, Stanski DR: Computer simulation of the effects of alterations in blood flows and body composition on thiopental pharmacokinetics in humans. *ANESTHESIOLOGY* 1997; 87:884–99
  36. Davis PJ, Stiller RL, Wilson AS, McGowan FX, Egan TD, Muir KT: In vitro remifentanyl metabolism: The effects of whole blood constituents and plasma butyrylcholinesterase. *Anesth Analg* 2002; 95:1305–7
  37. Cortínez LI, Anderson BJ, Penna A, Olivares L, Muñoz HR, Holford NH, Struys MM, Sepulveda P: Influence of obesity on propofol pharmacokinetics: Derivation of a pharmacokinetic model. *Br J Anaesth* 2010; 105:448–56
  38. Ingrande J, Brodsky JB, Lemmens HJ: Lean body weight scalar for the anesthetic induction dose of propofol in morbidly obese subjects. *Anesth Analg* 2011; 113:57–62
  39. McLeay SC, Morrish GA, Kirkpatrick CM, Green B: Encouraging the move towards predictive population models for the obese using propofol as a motivating example. *Pharm Res* 2009; 26:1626–34
  40. Eleveld DJ, Proost JH, Absalom AR, Struys MM: Obesity and allometric scaling of pharmacokinetics. *Clin Pharmacokinet* 2011; 50:751–3; discussion 755–6
  41. McLeay SC, Morrish GA, Kirkpatrick CM, Green B: The relationship between drug clearance and body size: Systematic review and meta-analysis of the literature published from 2000 to 2007. *Clin Pharmacokinet* 2012; 51:319–30
  42. Fisher DM, Shafer SL: Allometry, shallometry! *Anesth Analg* 2016; 122:1234–8
  43. Minto CF, Schnider TW, Gregg KM, Henthorn TK, Shafer SL: Using the time of maximum effect site concentration to combine pharmacokinetics and pharmacodynamics. *ANESTHESIOLOGY* 2003; 99:324–33
  44. Beal SL: Ways to fit a PK model with some data below the quantification limit. *J Pharmacokinet Pharmacodyn* 2001; 28:481–504
  45. Yang S, Roger J: Evaluations of Bayesian and maximum likelihood methods in PK models with below-quantification-limit data. *Pharm Stat* 2010; 9:313–30
  46. Han PY, Duffull SB, Kirkpatrick CM, Green B: Dosing in obesity: a simple solution to a big problem. *Clin Pharmacol Ther* 2007; 82:505–8
  47. Pai MP: Drug dosing based on weight and body surface area: Mathematical assumptions and limitations in obese adults. *Pharmacotherapy* 2012; 32:856–68

## Appendix. Remifentanyl Pharmacokinetics in Obesity Investigators

The Remifentanyl Pharmacokinetics in Obesity Investigators for this study are as follows: Charles F. Minto, M.D., Ph.D., Luca La Colla, M.D., David R. Drover, M.D., Jaap Vuyk, M.D. Ph.D., Martijn Mertens, M.D.
